# Supplementary material
Source: PubMed Central journal article supplement (PMC6054565)
Supplement: NIHMS957202-supplement-Supporting_Information.pdf [file NIHMS957202-supplement-Supporting_Information.pdf]

# SUPPORTING INFORMATION

## FOR

### Chemiluminescent Biosensors for Detection of Second Messenger Cyclic di-GMP

*Andrew B. Dippel<sup>1</sup>, Wyatt A. Anderson<sup>1</sup>, Robert S. Evans<sup>2</sup>, Samuel Deutsch<sup>2,3,4</sup>, and Ming C. Hammond<sup>1,5\*</sup>*

<sup>1</sup>Department of Chemistry, University of California, Berkeley, 94720, USA

<sup>2</sup>DOE Joint Genome Institute, 2800 Mitchell Drive, Walnut Creek, CA 94598, USA

<sup>3</sup>Environmental Genomics and Systems Biology Division, and <sup>4</sup>Biological Systems and Engineering Division, Lawrence Berkeley National Laboratory, 1 Cyclotron Road, Berkeley, CA 94720, USA

<sup>5</sup>Department of Molecular & Cell Biology, University of California, Berkeley, 94720, USA

\*Corresponding author

## Table of Contents

|                                                                                                  |         |
|--------------------------------------------------------------------------------------------------|---------|
| <b>Additional methods</b> .....                                                                  | S3-S5   |
| <b>Figure S1.</b> Workflow for lysate-based biosensor assay.....                                 | S6      |
| <b>Figure S2.</b> Lysate-based screen of <i>EcYcgR</i> biosensor mutant and linker variants..... | S7      |
| <b>Figure S3.</b> Analysis of mCherry tag as measure of biosensor stability.....                 | S8      |
| <b>Figure S4.</b> Lysate-based screen of phylogenetic library variants.....                      | S9      |
| <b>Figure S5.</b> In vitro characterization of biosensor variants.....                           | S10     |
| <b>Table S1.</b> Oligonucleotides used in this study.....                                        | S11-S12 |
| <b>Table S2.</b> Phylogenetic sequence variants.....                                             | S13-S16 |
| <b>Table S3.</b> Amino acid sequences of biosensor plasmids.....                                 | S17     |
| <b>Table S4.</b> Nucleotide sequences of biosensor plasmids.....                                 | S18-S19 |
| <b>Supplemental Notes</b> .....                                                                  | S20-S21 |
| <b>References</b> .....                                                                          | S21     |

## **ADDITIONAL METHODS**

**General reagents and oligonucleotides.** Cyclic dinucleotides were purchased from Axxora, LLC. Coelenterazine-h was purchased from NanoLight Technologies and stored as a ~6.15 mM stock in EtOH at -80 °C. Oligonucleotides used in molecular cloning were purchased from Elim Biopharmaceuticals.

**Molecular cloning.** The pRSET<sub>B</sub>-Nano-lantern plasmid was a gift from Takeharu Nagai (Addgene plasmid # 51969). Plasmids encoding YhjH, WspR alleles, and PleD were available in our lab. For expression and purification, all biosensor constructs were cloned into the pRSET<sub>B</sub> plasmid between the NdeI and EcoRI sites with an N-terminal His-tag. Overlap-extension PCR was used to add the three N-terminal residues back to RLuc8 to create pRSET<sub>B</sub>-Nano-lantern (1.1). All NL biosensor constructs using *EcYcgR* were cloned into pRSET<sub>B</sub> using Gibson Assembly<sup>1</sup> in which both linear backbone and insert fragments were amplified by PCR. The *EcYcgR* sequence was amplified from BL21 Star genomic DNA and mutant alleles were generated using site-directed mutagenesis. For lysate or live-cell based experiments, YNL and *EcYcgR* biosensor constructs were amplified by PCR and ligated into pET21 and/or pET24 plasmids between NdeI and HindIII sites and included a C-terminal His-tag. To create mCherry tagged versions of these plasmids, mCherry was amplified by PCR to add a flexible linker (GSGGSGGS) at the N-terminus then ligated between BamHI and HindIII sites of the empty plasmid to generate pET21-linker-mCherry and pET24-linker-mCherry. YNL and *EcYcgR* biosensor constructs were then amplified by PCR and ligated into the pET21- or pET24-linker-mCherry plasmid between NdeI and BamHI sites.

**Protein purification.** *E. coli* BL21 (DE3) Star cells (Life Technologies) were transformed with the pRSET<sub>B</sub> vector encoding N-terminally His-tagged NL biosensor variants. Transformants were cultured in 2xYT medium at 37 °C until OD reached ~0.8–1.0, followed by induction of protein expression with 0.1 mM IPTG for 20 h at 20 °C. Cells were collected and lysed by sonication in lysis buffer [50 mM Tris (pH 7.5), 150 mM NaCl, 20 mM imidazole, 5% (v/v) glycerol] with 300 µg/mL lysozyme and 1 mM PMSF added. Clarified lysate was bound to Ni-NTA agarose (Thermo Scientific), and resin was washed with lysis buffer supplemented with 500 mM NaCl prior to elution with lysis buffer supplemented with 300 mM imidazole. Using Amicon Ultra-15 Centrifugal Filter Units (molecular weight cutoff 10 kDa; Millipore), the elution fractions were

concentrated and dialyzed to storage buffer [50 mM HEPES (pH 7.2), 100 mM KCl, 10% (v/v) glycerol]. Concentrated protein was flash frozen in liquid nitrogen then stored at -80 °C in small aliquots to prevent repetitive freeze-thaw cycles. Protein concentrations were determined using the absorption of Venus at 515 nm (extinction coefficient = 92200 M<sup>-1</sup> cm<sup>-1</sup>). In stated cases, cells were co-transformed with the pCOLA-PdeH plasmid lacking a His-tag to enable purification of the biosensor without c-di-GMP bound.

**Phylogenetic library generation.** YcgR sequence variants employed were selected using the Pfam database. Briefly, Pfam was searched for all PilZ-domain containing proteins with a domain architecture similar to EcYcgR (YcgR-PilZ), which were presumed to undergo conformational changes upon binding c-di-GMP. The query resulted in 840 total sequences (258 sequences with YcgR-PilZ, 582 sequences with YcgR\_2-PilZ), then a subset of 92 sequences were chosen for synthesis and cloning into the biosensor scaffold (pET21- and pET24-biosensor-mCherry). All sequences from suspected thermophilic organisms were given priority, and all remaining sequences were chosen from a large variety of bacterial genomes. The selected genes were codon optimized and ‘polished’ to remove DNA synthesis constraints using BOOST.<sup>2</sup> Double stranded DNA was obtained from Gen9 (Ginkgo Bioworks). For cloning into the pET21 and pET24 derived vectors using Gibson cloning,<sup>1</sup> 25 bp linkers at the beginning and end of the sequences were included. Eight colonies per construct were sequenced verified using PACBIO RSII system (Pacific Biosciences), and variant calling was performed using the GATK software package.<sup>3</sup>

**Cellular c-di-GMP measurements with biosensor co-expression.** Single colonies of BL21(DE3) star *E. coli* cells co-transformed with pET21-biosensor-mCherry plasmids and pCOLA-PdeH or pCOLA-WspR-D70E were resuspended in 500 µL of P-0.5G non-inducing media [0.5% glucose, 25 mM (NH<sub>4</sub>)<sub>2</sub>SO<sub>4</sub>, 50 mM KH<sub>2</sub>PO<sub>4</sub>, 50 mM Na<sub>2</sub>HPO<sub>4</sub>, 1 mM MgSO<sub>4</sub>]<sup>4</sup> supplemented with 100 µg/mL kanamycin and 50 µg/mL carbenicillin in 2.2 mL 96-well deep well plates (VWR), then grown at 37 °C, 325 rpm, for 24 h to generate pre-cultures. A 5 µL aliquot of each pre-culture was used to inoculate 500 µL of ZYP-5052 auto-induction media [25 mM (NH<sub>4</sub>)<sub>2</sub>SO<sub>4</sub>, 50 mM KH<sub>2</sub>PO<sub>4</sub>, 50 mM Na<sub>2</sub>HPO<sub>4</sub>, 1 mM MgSO<sub>4</sub>, 0.5% (v/v) glycerol, 0.05% glucose, 0.2% α-lactose, 1% tryptone, and 0.5% yeast extract]<sup>4</sup> supplemented with 100 µg/mL kanamycin and 50 µg/mL carbenicillin in a deep well plate and grown at 37 °C, 325 rpm, for 20 h

to allow for protein expression. For live cell measurements, cultures were harvested by centrifugation, media was removed, and cell pellets were resuspended in 500  $\mu\text{L}$  PBS. A 100  $\mu\text{L}$  aliquot of each culture was transferred to an opaque white 96-well plate, and the plate was incubated at 28  $^{\circ}\text{C}$  for 10 min. The mCherry fluorescence intensity was measured for each well, 20  $\mu\text{L}$  chemiluminescent substrate was added manually to each well, and then total chemiluminescence was monitored over 10 min. Luminescent signal was calculated as the total chemiluminescence at 10 min divided by the mCherry fluorescence intensity to normalize differences in biosensor expression between biological replicates.

For lysate measurements, cultures were harvested and clarified lysates were prepared as described for the lysate-based assay for biosensor activity, except each culture was resuspended in 240  $\mu\text{L}$  screening buffer. A 100  $\mu\text{L}$  aliquot of each clarified lysate was carefully pipetted into an opaque white 96-well plate, and the plate was incubated at 28  $^{\circ}\text{C}$  for 10 min. The mCherry fluorescence intensity was measured for each well, then chemiluminescent substrate was injected and chemiluminescence was measured as described in the lysate-based assay. Luminescent signal was calculated as the total chemiluminescence divided by the mCherry fluorescence intensity to normalize differences in biosensor expression between biological replicates.

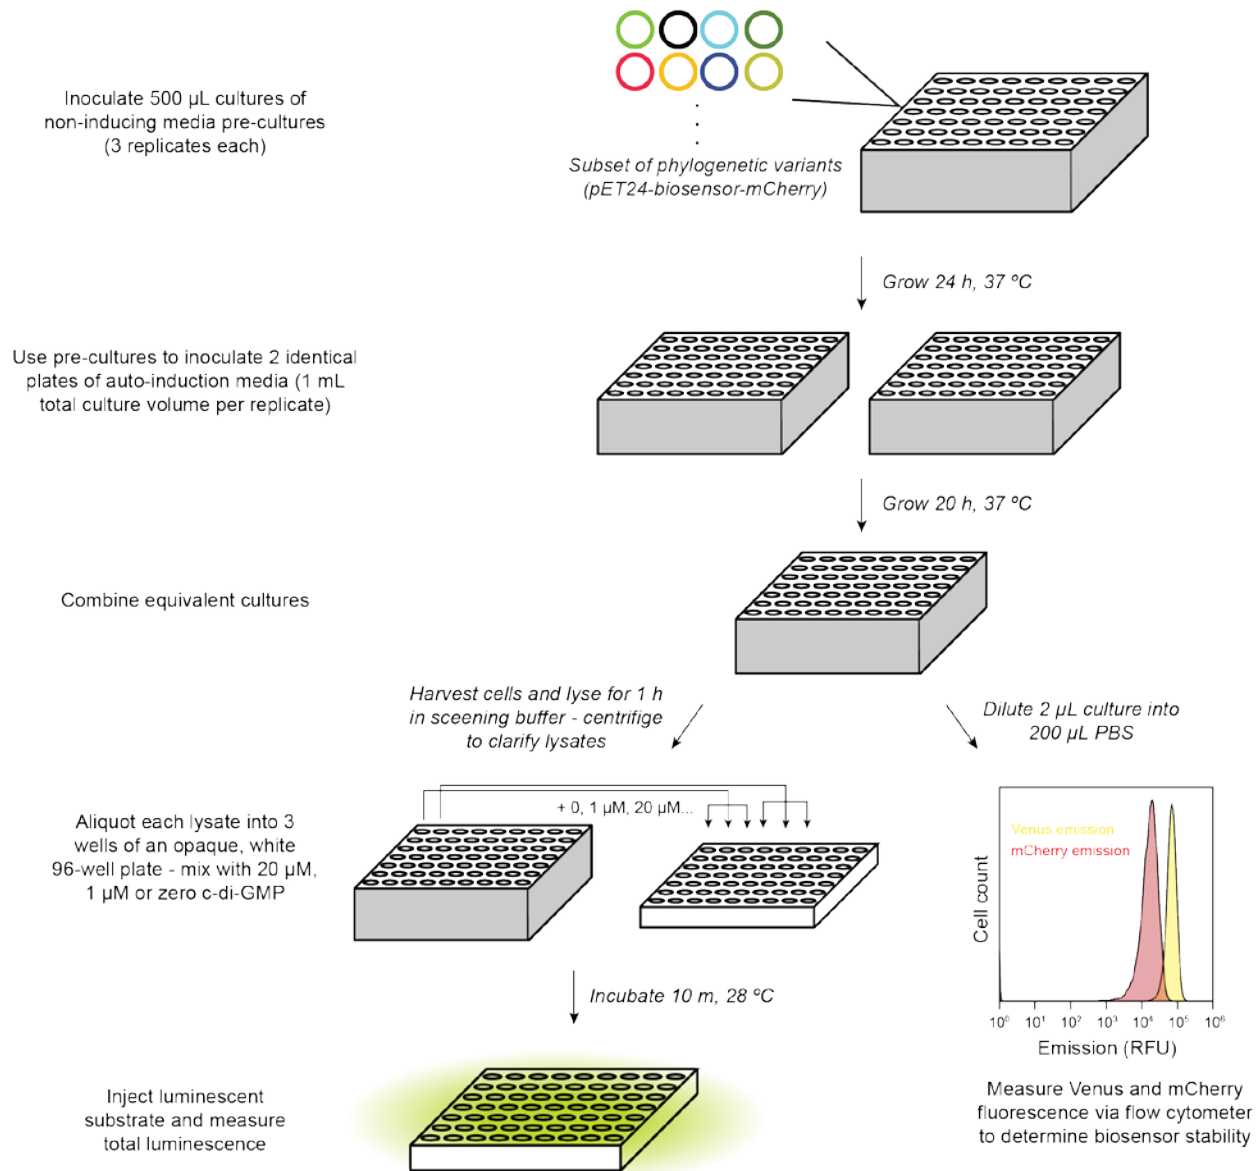

**Figure S1.** Workflow for lysate-based biosensor assay. *E. coli* transformed with biosensor variants are grown in non-inducing media in deep-well plates to generate pre-cultures. The following day, pre-cultures are used to inoculate auto-induction media and cultures are grown overnight. The next day, a small aliquot of cells is analyzed via flow cytometry to determine relative biosensor expression and stability. The remaining cells are harvested and lysed in screening buffer. Clarified lysates are mixed with c-di-GMP in an opaque white, 96-well plate, chemiluminescent substrate is added, and total chemiluminescent signal is measured to determine signal fold-changes.

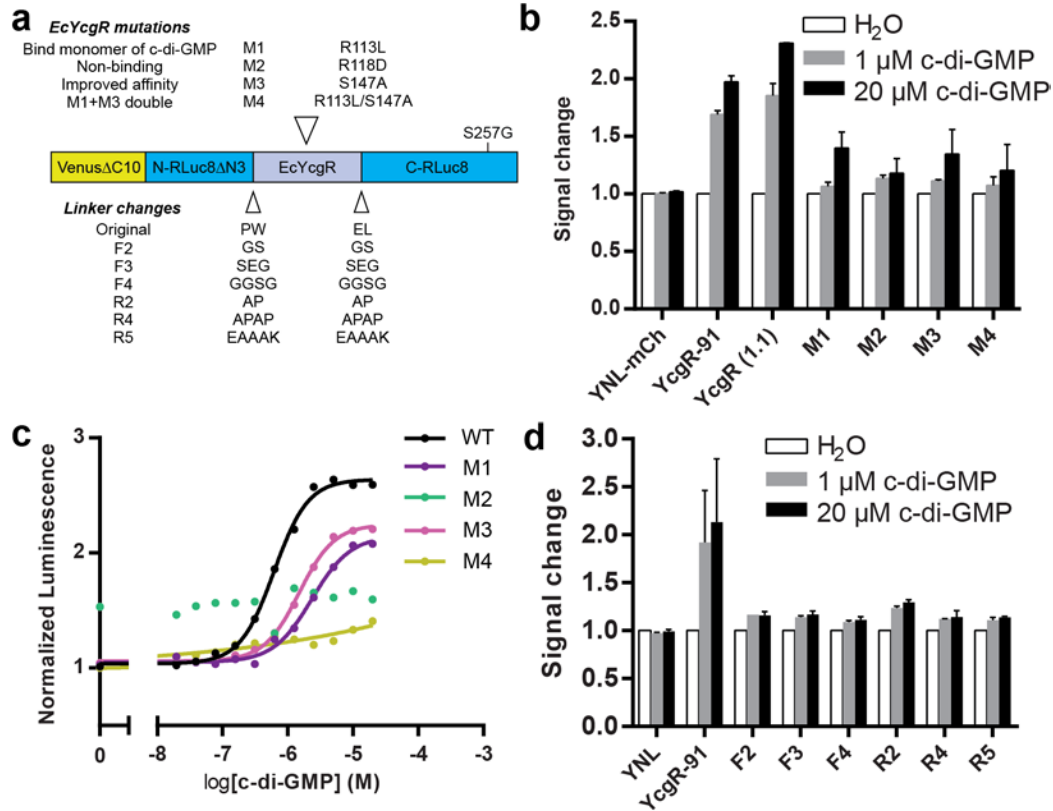

**Figure S2.** Lysate-based screen of *EcYcgR* biosensor mutant and linker variants. (a) Schematic of *EcYcgR*-91 biosensor showing different mutations to *EcYcgR* and the different linkers tested. (b) Signal change for *EcYcgR*-91 biosensors and mutants in the lysate-based assay. Data are from 2 biological replicates represented as mean  $\pm$  SD. (c) Biosensor binding affinity measurements with purified *EcYcgR*-91 mutants. Data are presented as mean of 3 replicates. Error bars are omitted for clarity. (d) Signal change for *EcYcgR*-91 linker variants in the lysate-based assay. Data are from 2 biological replicates represented as mean  $\pm$  SD.

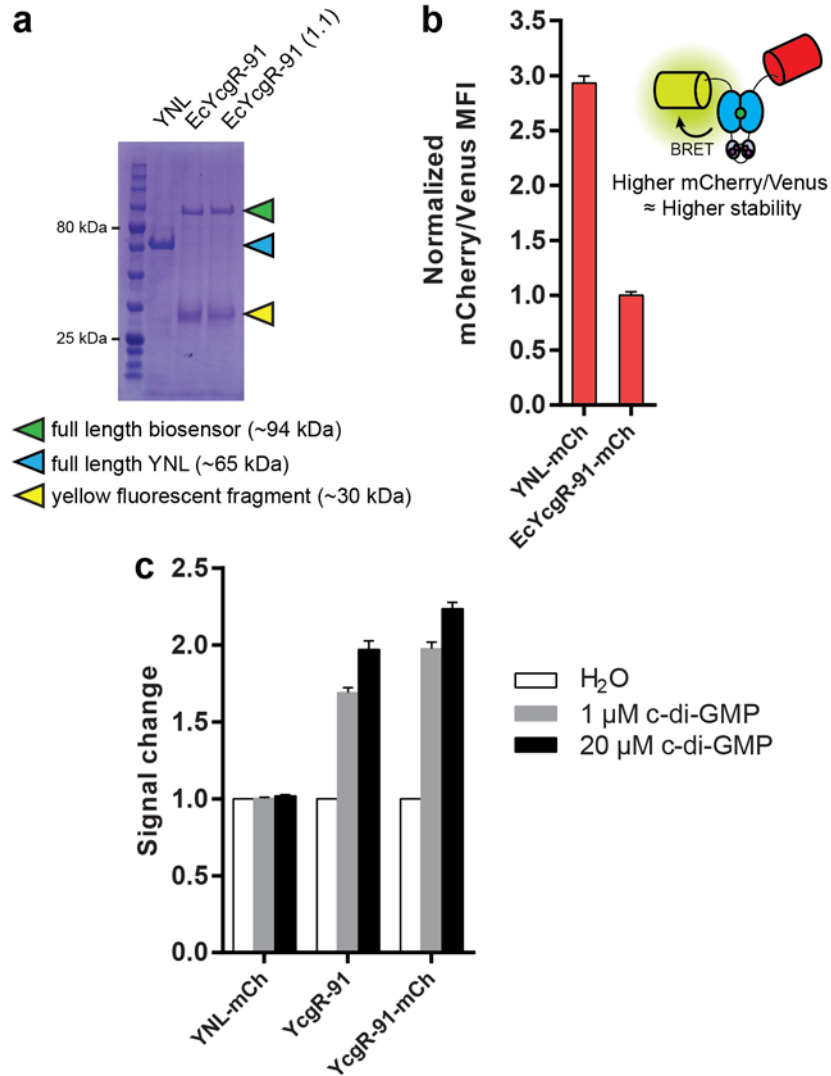

**Figure S3.** Analysis of mCherry tag as measure of biosensor stability. (a) SDS-PAGE of purified proteins showing presence of truncated protein products for NL biosensor constructs. (b) Normalized mCherry/Venus MFI ratios of cells expressing mCherry tagged NL constructs as measured by flow cytometry. Ratios are normalized to the ratio for EcYcgR-91-mCh and show that the ratio correlates with relative protein stability. Data are from 3 biological replicates represented as mean  $\pm$  SD. (c) Signal change for NL constructs in the lysate-based assay show the mCherry tag has no negative effect on biosensor performance. Data are from 2 biological replicates represented as mean  $\pm$  SD.



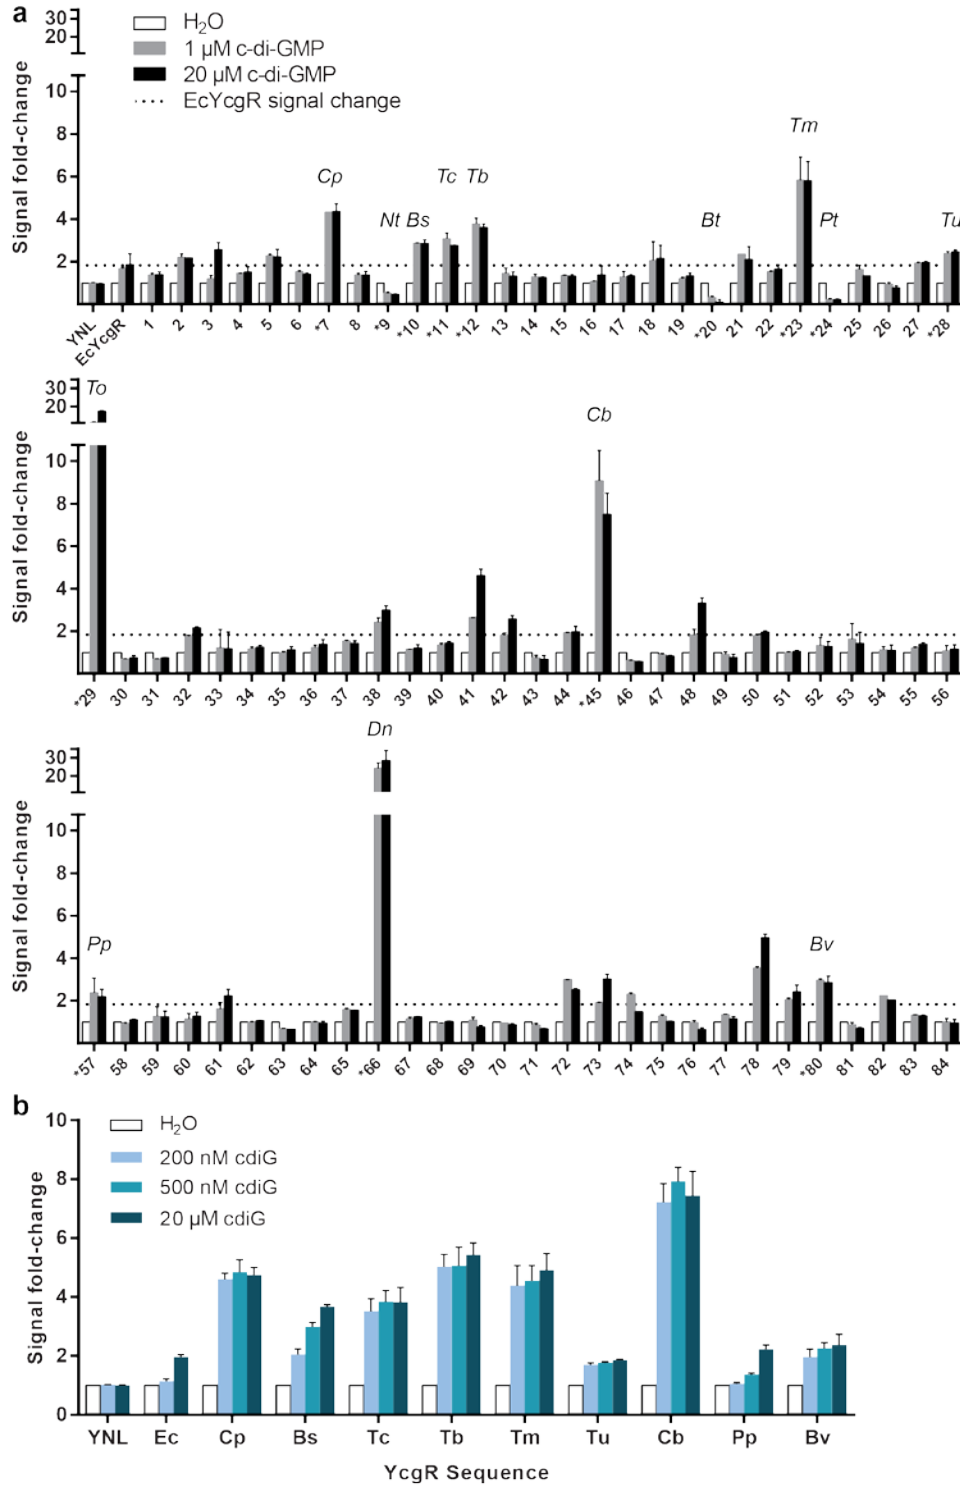

**Figure S4.** Lysate-based screen of phylogenetic library variants. (a) Signal fold-change for the 84 active phylogenetic biosensor variants. Labeled sequences were chosen for further characterization due to apparent high affinity, large signal change, or negative signal change. See Table S2 for numbering. Data are from 2 biological replicates represented as mean  $\pm$  SD. (b) Signal fold-change for selected high affinity variants. Selected variants were re-screened in the lysate-based assay with lower concentrations of c-di-GMP. Data are from 3 biological replicates represented as mean  $\pm$  SD.

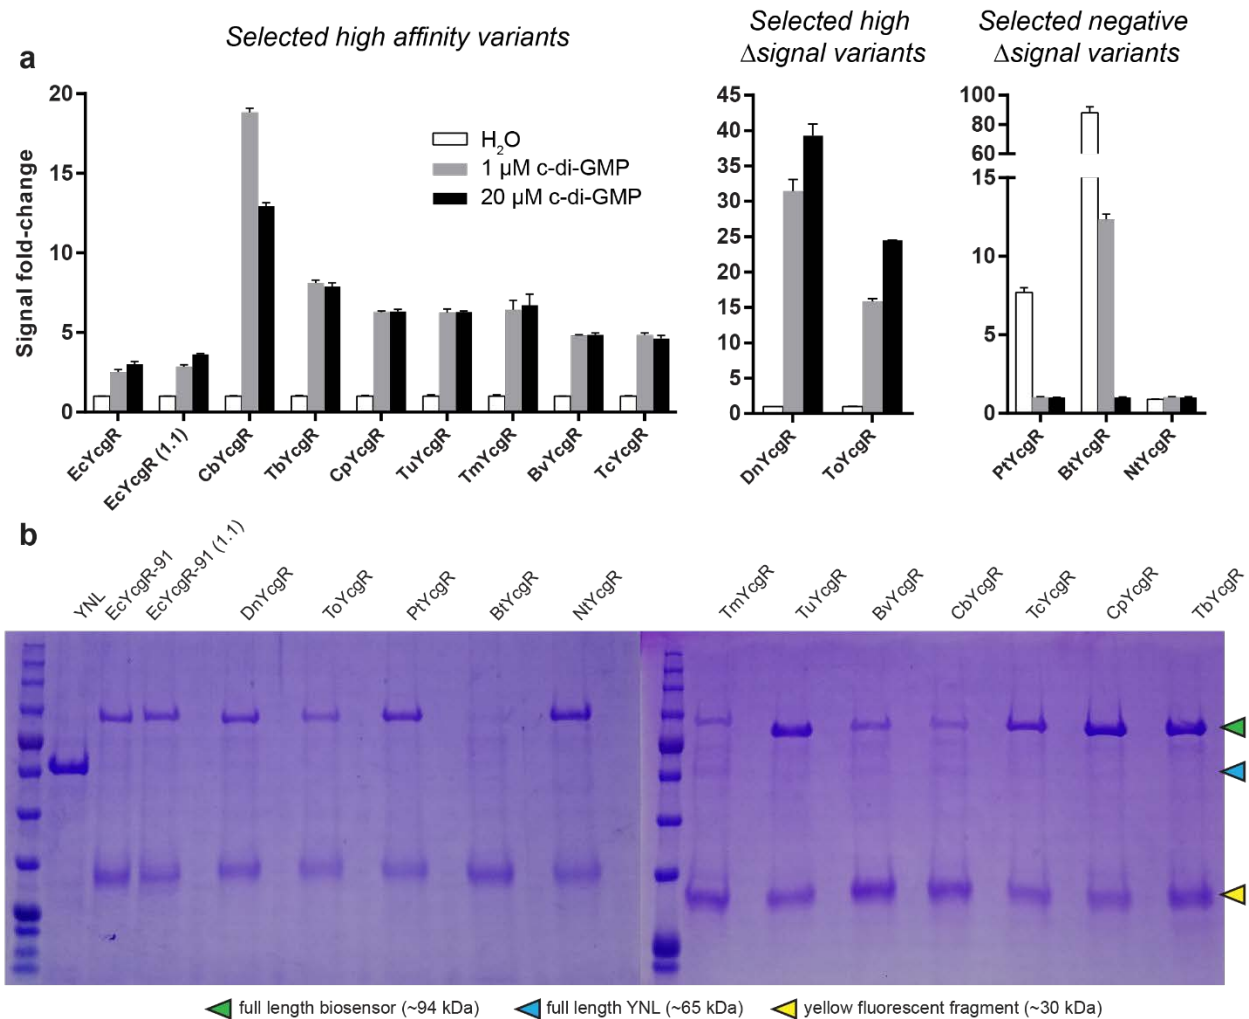

**Figure S5.** In vitro characterization of biosensor variants. (a) Same data as in Figure 3b, but presented as signal fold-change. Values are normalized to no c-di-GMP for selected high affinity and high  $\Delta$ signal variants, and values are normalized to 20  $\mu$ M c-di-GMP for negative  $\Delta$ signal variants. Signal change data is summarized in Table 1. Data are from 3 replicates represented as mean  $\pm$  SD. (b) SDS-PAGE of all purified biosensor variants used for in vitro characterization showing the presence of a truncated protein product that is fluorescent.

**Table S1. Oligonucleotides used in this study**

| Name                         | Sequence (5' to 3')                                   |
|------------------------------|-------------------------------------------------------|
| REV-RLuc228-YcgR-insert      | ACGATCTGCACCACGTCGGGCTTGCCGAGCTCGTCGCGCACTTTGTCCGC    |
| FWD-RLuc228-YcgR-insert      | GATCCCCCTGGTGAAGGGCCCATGGATGAGTCATTACCATGAGCAGTTCC    |
| REV-RLuc228-YcgR-vector      | AACTGCTCATGGTAATGACTCATCCATGGGCCCTTACCAGGGGGATCTC     |
| FWD-RLuc228-YcgR-vector      | GGGAAAAAGCGGACAAAGTGC GCGACGAGCTCGGCAAGCCCGACGTGGTG   |
| FWD-RLuc91-YcgR-insert       | AGAGCGGCAACGGCAGCccatggATGagt cattacatgagcagttcctg    |
| REV-RLuc91-YcgR-insert       | GTA CTTGTAGTGGTCCAGCAGCCTGTAgagctcgctcgcgcaactttgtccg |
| FWD-RLuc91-YcgR-vector       | ggacaaagtgcgcgacgagctcTACAGGCTGCTGGACCACTACAAGTACC    |
| REV-RLuc91-YcgR-vector       | aggaactgctcatggtaatgactCATccatggGCTGCCGTTGCCGCTCTT    |
| FWD-Venus (-C10)-BamHi       | gtagtagGgatccgATGGTGAGCAAGG                           |
| REV-Venus (-C10)-add RLuc N3 | CCTTGCTGGCCATggtaccCCCGGCGG                           |
| FWD-RLuc-add RLuc N3         | ggtaccATGGCCAGCAAGGTGTACGACCCCGAGC                    |
| REV-RLuc-EcoRI               | gtagtagGAATTcTTACTGCTCGTTCTTCAGCA                     |
| FWD-Rluc91-Ycgr-GS-insert    | AGAGCGGCAACGGCAGCggcagcATGagt cattacatgagcagttcctg    |
| REV-Rluc91-ycgr-GS-insert    | GTA CTTGTAGTGGTCCAGCAGCCTGTAgctgccgctcgcgcaactttgtccg |
| REV-Rluc91-ycgr-GS-vector    | aggaactgctcatggtaatgactCATgctgccGCTGCCGTTGCCGCTCTT    |
| FWD-Rluc91-ycgr-GS-vector    | ggacaaagtgcgcgacggcagcTACAGGCTGCTGGACCACTACAAGTACC    |
| FWD-Rluc91-ycgr-SEG-insert   | GCGGCAACGGCAGCagcgagggcATGagt cattacatgagcagttcctg    |
| REV-Rluc91-ycgr-SEG-insert   | CTTGTAGTGGTCCAGCAGCCTGTAgccctcgctgctcgcgcaactttgtccg  |
| REV-Rluc91-ycgr-SEG-vector   | aactgctcatggtaatgactCATgccctcgctGCTGCCGTTGCCGCTCTT    |
| FWD-Rluc91-ycgr-SEG-vector   | caaagtgcgcgacagcgagggcTACAGGCTGCTGGACCACTACAAGTACC    |
| FWD-Rluc91-ycgr-GGSG-insert  | GCAACGGCAGCggcggcagcggcATGagt cattacatgagcagttcctg    |
| REV-Rluc91-ycgr-GGSG-insert  | GTA GTGGTCCAGCAGCCTGTAgccgctgcgcccgtcgcgcaactttgtccg  |
| REV-Rluc91-ycgr-GGSG-vector  | tgctcatggtaatgactCATgccgctgcccccGCTGCCGTTGCCGCTCTT    |
| FWD-Rluc91-ycgr-GGSG-vector  | agtgcgcgacggcggcagcggcTACAGGCTGCTGGACCACTACAAGTACC    |
| FWD-Rluc91-ycgr-AP-insert    | AGAGCGGCAACGGCAGCgccccATGagt cattacatgagcagttcctg     |
| REV-Rluc91-ycgr-AP-insert    | GTA CTTGTAGTGGTCCAGCAGCCTGTAgggggcgctcgcgcaactttgtccg |
| FWD-Rluc91-ycgr-AP-vector    | ggacaaagtgcgcgacgccccTACAGGCTGCTGGACCACTACAAGTACC     |
| REV-Rluc91-ycgr-AP-vector    | aggaactgctcatggtaatgactCATgggggcGCTGCCGTTGCCGCTCTT    |
| FWD-Rluc91-ycgr-APAP-insert  | GCAACGGCAGCgccccgccccATGagt cattacatgagcagttcctg      |
| REV-Rluc91-ycgr-APAP-insert  | GTA GTGGTCCAGCAGCCTGTAgggggcgggggcgctcgcgcaactttgtccg |
| REV-Rluc91-ycgr-APAP-vector  | tgctcatggtaatgactCATgggggcgggggcGCTGCCGTTGCCGCTCTT    |
| FWD-Rluc91-ycgr-APAP-vector  | agtgcgcgacgccccgccccTACAGGCTGCTGGACCACTACAAGTACC      |
| FWD-Rluc91-ycgr-EAAAK-insert | ACGGCAGCgaggccgcccgaagATGagt cattacatgagcagttcctg     |
| REV-Rluc91-ycgr-EAAAK-insert | GTGGTCCAGCAGCCTGTActtggcggcggcctcgctcgcgcaactttgtccg  |
| REV-Rluc91-ycgr-EAAAK-vector | tcatggtaatgactCATcttggcggcggcctcGCTGCCGTTGCCGCTCTT    |
| FWD-Rluc91-ycgr-EAAAK-vector | gcgcgacgagggccgcccgaagTACAGGCTGCTGGACCACTACAAGTACC    |
| FWD-YcgR-R113L quikchange    | cacctatggtttgtacaactacgccgatatttccg                   |
| REV-YcgR-R113L quikchange    | cggaaatatcggcgtagttgtacaaccataaggtg                   |
| FWD-YcgR-R118D-rth           | GAcattctccgccccactcc                                  |

|                               |                                               |
|-------------------------------|-----------------------------------------------|
| REV-YcgR-R118D-rth            | gaaatatcggcgtcgttgtacaaacc                    |
| FWD-YcgR-S147A-rth            | Gcgtaggcggcatggg                              |
| REV-YcgR-S147A-rth            | caaatcatacagggcggaaacg                        |
| FWD-YNL-NdeI                  | tattcacatATGGTGAGCAAGGGCGAGG                  |
| REV-YNL-HindIII (no stop)     | cgtaagcttCTGCTCGTTCTTCAGCACTCTCTC             |
| REV-YNL-BamHI (no stop)       | ataggatccCTGCTCGTTCTTCAGCACTCTCTC             |
| FWD-mCherry w/ linker-BamHI   | ataggatccggcggcagcggcggcagcATGGTGAGCAAGGGCGA  |
| REV-mCherry-HindIII (no stop) | tataagcttCTGTACAGCTCGTCCATGCC                 |
| FWD-YNL-pRSET insert          | GACGATGACGATAAGgatccgATGGTGAGCAAGGGCGAG       |
| REV-YNL-pRSET insert          | CCGGATCAAGCTTCGAATTcTTACTGCTCGTTCTTCAGCACTCTC |

**Table S2. Phylogenetic sequence variants**

Notes: Orange highlighted organism names are predicted thermophiles. Any sequence without a number label (numbering used in Figure S4) produced very low luminescence activity in the lysate-based screen and was not included in any data shown.

| UniProt accession | Description                           | Organism                                                                                                          | Domain arch | Length | Number | Name |
|-------------------|---------------------------------------|-------------------------------------------------------------------------------------------------------------------|-------------|--------|--------|------|
| YCGRL_VIBCH       | Cyclic di-GMP binding protein VCA0042 | Vibrio cholerae serotype O1 (strain ATCC 39315 / El Tor Inaba N16961)                                             | YcgR2-PilZ  | 252    | 1      |      |
| YCGR_PSEPK        | Flagellar brake protein YcgR          | Pseudomonas putida (strain KT2440)                                                                                | YcgR-PilZ   | 247    | 2      |      |
| YCGR_SALTY        | Flagellar brake protein YcgR          | Salmonella typhimurium (strain LT2 / SGSC1412 / ATCC 700720)                                                      | YcgR-PilZ   | 244    | 3      |      |
| Q9HYP3_PSEAE      | Uncharacterized protein               | Pseudomonas aeruginosa (strain ATCC 15692 / DSM 22644 / CIP 104116 / JCM 14847 / LMG 12228 / 1C / PRS 101 / PAO1) | YcgR-PilZ   | 263    | 4      |      |
| Q67PC2_SYMTH      | Putative uncharacterized protein      | Symbiobacterium thermophilum (strain T / IAM 14863)                                                               | YcgR2-PilZ  | 234    | 5      |      |
| R7RRU9_9CLOT      | Flagellar protein                     | Thermobrachium celere DSM 8682                                                                                    | YcgR2-PilZ  | 223    | 6      |      |
| B5Y7A9_COPPD      | Type IV pilus assembly protein PilZ   | Coprothermobacter proteolyticus (strain ATCC 35245 / DSM 5265 / BT)                                               | YcgR2-PilZ  | 233    | 7      | Cp   |
| G0GFW8_SPITZ      | Type IV pilus assembly PilZ           | Spirochaeta thermophila (strain ATCC 700085 / DSM 6578 / Z-1203)                                                  | YcgR2-PilZ  | 369    |        |      |
| M1E4L7_9FIRM      | Type IV pilus assembly PilZ           | Thermodesulfobium narugense DSM 14796                                                                             | YcgR2-PilZ  | 246    | 8      |      |
| G0GFW8_SPITZ      | Type IV pilus assembly PilZ           | Spirochaeta thermophila (strain ATCC 700085 / DSM 6578 / Z-1203)                                                  | YcgR2-PilZ  | 357    |        |      |
| B7GHM9_ANOFW      | Predicted glycosyltransferase         | Anoxybacillus flavithermus (strain DSM 21510 / WK1)                                                               | YcgR2-PilZ  | 239    |        |      |
| B2A369_NATTJ      | Type IV pilus assembly PilZ           | Natranaerobius thermophilus (strain ATCC BAA-1301 / DSM 18059 / JW/NM-WN-LF)                                      | YcgR2-PilZ  | 225    | 9      | Nt   |
| A0A150LBE3_9BACI  | Uncharacterized protein               | Bacillus sporothermodurans                                                                                        | YcgR2-PilZ  | 216    | 10     | Bs   |
| A1HN17_9FIRM      | Type IV pilus assembly PilZ           | Thermosinus carboxydivorans Nor1                                                                                  | YcgR2-PilZ  | 211    | 11     | Tc   |
| A0A124FJ12_9FIRM  | Type IV pilus assembly PilZ           | Thermoanaerobacteriales bacterium 50_218                                                                          | YcgR2-PilZ  | 220    | 12     | Tb   |
| D5XFF1_THEPJ      | Type IV pilus assembly PilZ           | Thermincola potens (strain JR)                                                                                    | YcgR2-PilZ  | 219    | 13     |      |
| A0A0S3QVC2_9AQUI  | Type IV pilus assembly PilZ           | Thermosulfidibacter takaii ABI70S6                                                                                | YcgR2-PilZ  | 242    | 14     |      |
| B8CYP6_HALOH      | Type IV pilus assembly PilZ           | Halothermothrix orenii (strain H 168 / OCM 544 / DSM 9562)                                                        | YcgR2-PilZ  | 216    | 15     |      |
| D7CM20_SYNLT      | Type IV pilus assembly PilZ           | Syntrophothermus lipocalidus (strain DSM 12680 / TGB-C1)                                                          | YcgR2-PilZ  | 216    | 16     |      |
| B0K9S5_THEP3      | Type IV pilus assembly PilZ           | Thermoanaerobacter pseudethanolicus (strain ATCC 33223 / 39E)                                                     | YcgR2-PilZ  | 209    | 17     |      |

|                  |                                  |                                                                                                                     |            |     |    |    |
|------------------|----------------------------------|---------------------------------------------------------------------------------------------------------------------|------------|-----|----|----|
| I3VWB4_THESW     | Type IV pilus assembly PilZ      | <i>Thermoanaerobacterium saccharolyticum</i> (strain DSM 8691 / JW/SL-YS485)                                        | YcgR2-PilZ | 209 | 18 |    |
| K8EBV6_9FIRM     | Type IV pilus assembly PilZ      | <i>Desulfotomaculum hydrothermale</i> Lam5 = DSM 18033                                                              | YcgR2-PilZ | 227 | 19 |    |
| A0A090IV04_9BACI | Glycosyltransferase              | <i>Bacillus thermoamylovorans</i>                                                                                   | YcgR2-PilZ | 220 | 20 | Bt |
| A8F4V2_PSELT     | Type IV pilus assembly PilZ      | <i>Pseudothermotoga lettingae</i> (strain ATCC BAA-301 / DSM 14385 / NBRC 107922 / TMO)                             | YcgR2-PilZ | 234 | 21 |    |
| F7YXY9_9THEM     | Type IV pilus assembly PilZ      | <i>Pseudothermotoga thermarum</i> DSM 5069                                                                          | YcgR2-PilZ | 227 | 22 |    |
| Q9X007_THEMA     | Flagellar protein                | <i>Thermotoga maritima</i> (strain ATCC 43589 / MSB8 / DSM 3109 / JCM 10099)                                        | YcgR2-PilZ | 229 | 23 | Tm |
| A5D0H5_PELTS     | Glycosyltransferase              | <i>Pelotomaculum thermopropionicum</i> (strain DSM 13744 / JCM 10971 / SI)                                          | YcgR2-PilZ | 219 | 24 | Pt |
| D9S3A4_THEOJ     | Type IV pilus assembly PilZ      | <i>Thermosediminibacter oceani</i> (strain ATCC BAA-1034 / DSM 16646 / JW/IW-1228P)                                 | YcgR2-PilZ | 212 | 25 |    |
| K4LH04_THEPS     | Type IV pilus assembly PilZ      | <i>Thermacetogenium phaeum</i> (strain ATCC BAA-254 / DSM 12270 / PB)                                               | YcgR2-PilZ | 220 | 26 |    |
| A6LMY0_THEM4     | Type IV pilus assembly PilZ      | <i>Thermosiphon melanesiensis</i> (strain DSM 12029 / CIP 104789 / BI429)                                           | YcgR2-PilZ | 220 | 27 |    |
| A0A101EVB1_9THEM | Type IV pilus assembly PilZ      | <i>Thermotoga</i> sp. 50_1627                                                                                       | YcgR2-PilZ | 227 | 28 | Tu |
| LOEE96_THECK     | Putative glycosyltransferase     | <i>Thermobacillus composti</i> (strain DSM 18247 / JCM 13945 / KWC4)                                                | YcgR2-PilZ | 217 | 29 | To |
| A3DCP7_CLOTH     | Type IV pilus assembly PilZ      | <i>Clostridium thermocellum</i> (strain ATCC 27405 / DSM 1237 / NBRC 103400 / NCIMB 10682 / NRRL B-4536 / VPI 7372) | YcgR2-PilZ | 224 | 30 |    |
| E6SJP9_THEM7     | Type IV pilus assembly PilZ      | <i>Thermaerobacter marianensis</i> (strain ATCC 700841 / DSM 12885 / JCM 10246 / 7p75a)                             | YcgR2-PilZ | 220 | 31 |    |
| Q2RKC8_MOOTA     | Glycosyltransferase-like protein | <i>Moorella thermoacetica</i> (strain ATCC 39073 / JCM 9320)                                                        | YcgR2-PilZ | 219 | 32 |    |
| D1B6A2_THEAS     | Type IV pilus assembly PilZ      | <i>Thermanaerovibrio acidaminovorans</i> (strain ATCC 49978 / DSM 6589 / Su883)                                     | YcgR2-PilZ | 227 | 33 |    |
| K8EH43_9FIRM     | Type IV pilus assembly PilZ      | <i>Desulfotomaculum hydrothermale</i> Lam5 = DSM 18033                                                              | YcgR2-PilZ | 208 | 34 |    |
| H2INW0_RAHC      | Flagellar brake protein YcgR     | <i>Rahnella aquatilis</i> (strain ATCC 33071 / DSM 4594 / JCM 1683 / NBRC 105701 / NCIMB 13365 / CIP 78.65)         | YcgR-PilZ  | 248 | 35 |    |
| A0A080M6H4_9PROT | Flagellar brake protein YcgR     | <i>Candidatus Accumulibacter</i> sp. SK-02                                                                          | YcgR-PilZ  | 266 | 36 |    |
| A0A0R0ARV1_9GAMM | Flagellar brake protein YcgR     | <i>Stenotrophomonas panacihumi</i>                                                                                  | YcgR-PilZ  | 265 | 37 |    |
| A0A063BEK1_9BURK | Flagellar brake protein YcgR     | <i>Burkholderia</i> sp. lig30                                                                                       | YcgR-PilZ  | 251 | 38 |    |

|                  |                                |                                                                                                             |           |     |    |    |
|------------------|--------------------------------|-------------------------------------------------------------------------------------------------------------|-----------|-----|----|----|
| Q7CK58_YERPE     | Flagellar brake protein YcgR   | <i>Yersinia pestis</i>                                                                                      | YcgR-PilZ | 252 | 39 |    |
| H8GFW9_METAL     | Flagellar brake protein YcgR   | <i>Methylobacterium album</i> BG8                                                                           | YcgR-PilZ | 239 | 40 |    |
| B4E8L7_BURCJ     | Flagellar brake protein YcgR   | <i>Burkholderia cenocepacia</i> (strain ATCC BAA-245 / DSM 16553 / LMG 16656 / NCTC 13227 / J2315 / CF5610) | YcgR-PilZ | 251 | 41 |    |
| S6B8T9_9PROT     | Flagellar brake protein YcgR   | <i>Sulfuricella denitrificans</i> skB26                                                                     | YcgR-PilZ | 257 | 42 |    |
| A0A0D5V569_9BURK | Flagellar brake protein YcgR   | <i>Paraburkholderia fungorum</i>                                                                            | YcgR-PilZ | 263 | 43 |    |
| YCGR_LARHH       | Flagellar brake protein YcgR   | <i>Laribacter hongkongensis</i> (strain HLHK9)                                                              | YcgR-PilZ | 271 | 44 |    |
| H1SBM0_9BURK     | Flagellar brake protein YcgR   | <i>Cupriavidus basilensis</i> OR16                                                                          | YcgR-PilZ | 233 | 45 | Cb |
| E1TCJ5_BURSG     | Flagellar brake protein YcgR   | <i>Burkholderia</i> sp. (strain CCGE1003)                                                                   | YcgR-PilZ | 263 | 46 |    |
| D8IT03_HERSS     | Flagellar brake protein YcgR   | <i>Herbaspirillum seropedicae</i> (strain SmR1)                                                             | YcgR-PilZ | 251 | 47 |    |
| C5AEG4_BURGB     | Flagellar brake protein YcgR   | <i>Burkholderia glumae</i> (strain BGR1)                                                                    | YcgR-PilZ | 250 | 48 |    |
| YCGR_NITEC       | Flagellar brake protein YcgR   | <i>Nitrosomonas eutropha</i> (strain C91)                                                                   | YcgR-PilZ | 269 |    |    |
| YCGR_THIDA       | Flagellar brake protein YcgR   | <i>Thiobacillus denitrificans</i> (strain ATCC 25259)                                                       | YcgR-PilZ | 255 | 49 |    |
| A0A126T293_9GAMM | Flagellar brake protein YcgR   | <i>Methylobacterium denitrificans</i>                                                                       | YcgR-PilZ | 249 | 50 |    |
| H5V7W3_ESCHE     | Flagellar brake protein YcgR   | <i>Escherichia hermannii</i> NBRC 105704                                                                    | YcgR-PilZ | 243 | 51 |    |
| YCGR1_DECAR      | Flagellar brake protein YcgR 1 | <i>Dechloromonas aromatica</i> (strain RCB)                                                                 | YcgR-PilZ | 264 | 52 |    |
| A9MP65_SALAR     | Flagellar brake protein YcgR   | <i>Salmonella arizonae</i> (strain ATCC BAA-731 / CDC346-86 / RSK2980)                                      | YcgR-PilZ | 244 | 53 |    |
| E6WB98_PANSA     | Flagellar brake protein YcgR   | <i>Pantoea</i> sp. (strain At-9b)                                                                           | YcgR-PilZ | 244 | 54 |    |
| S6ALU3_PSERE     | Flagellar brake protein        | <i>Pseudomonas resinovorans</i> NBRC 106553                                                                 | YcgR-PilZ | 264 | 55 |    |
| YCGR_METML       | Flagellar brake protein YcgR   | <i>Methylobacterium mobilis</i> (strain JLW8 / ATCC BAA-1282 / DSM 17540)                                   | YcgR-PilZ | 253 | 56 |    |
| L1LXK9_PSEPU     | Uncharacterized protein        | <i>Pseudomonas putida</i> CSV86                                                                             | YcgR-PilZ | 247 | 57 | Pp |
| A0A080MAN3_9PROT | Flagellar brake protein YcgR   | <i>Candidatus Accumulibacter</i> sp. BA-91                                                                  | YcgR-PilZ | 259 | 58 |    |
| A0A0L0GIP1_9ENTR | Flagellar brake protein YcgR   | <i>Trabulsiella odontotermitis</i>                                                                          | YcgR-PilZ | 243 | 59 |    |
| A0A0K1K509_9BURK | Flagellar brake protein YcgR   | <i>Massilia</i> sp. NR 4-1                                                                                  | YcgR-PilZ | 253 | 60 |    |
| A0A024HEU5_PSEKB | Flagellar brake protein YcgR   | <i>Pseudomonas knackmussii</i> (strain DSM 6978 / LMG 23759 / B13)                                          | YcgR-PilZ | 249 | 61 |    |
| A0A0S8DMJ3_9GAMM | Flagellar brake protein YcgR   | <i>Gamma</i> proteobacteria bacterium SG8_47                                                                | YcgR-PilZ | 252 | 62 |    |

|                  |                                                      |                                                                                           |            |     |    |    |
|------------------|------------------------------------------------------|-------------------------------------------------------------------------------------------|------------|-----|----|----|
| Q97H69_CLOAB     | Uncharacterized protein, YPFA<br>B.subtilis ortholog | Clostridium acetobutylicum (strain ATCC 824 / DSM 792 / JCM 1419 / LMG 5710 / VKM B-1787) | YcgR2-PilZ | 222 | 63 |    |
| A0A0U9HJ89_9THEO | C-di-GMP-binding flagellar brake protein YcgR        | Tepidanaerobacter syntrophicus                                                            | YcgR2-PilZ | 213 | 64 |    |
| A0A140LAQ7_9THEO | Flagellar brake protein YcgR                         | Fervidicola ferrireducens                                                                 | YcgR2-PilZ | 212 | 65 |    |
| D4H107_DENA2     | Type IV pilus assembly PilZ                          | Denitrovibrio acetiphilus (strain DSM 12809 / N2460)                                      | YcgR2-PilZ | 219 | 66 | Dn |
| D3PCV1_DEFDS     | Type IV pilus assembly protein PilZ                  | Deferribacter desulfuricans (strain DSM 14783 / JCM 11476 / NBRC 101012 / SSM1)           | YcgR2-PilZ | 223 | 67 |    |
| A8FEM7_BACP2     | Pilus assembly protein PilZ                          | Bacillus pumilus (strain SAFR-032)                                                        | YcgR2-PilZ | 215 | 68 |    |
| W6N5K7_CLOTY     | Flagellar protein                                    | Clostridium tyrobutyricum DIVETGP                                                         | YcgR2-PilZ | 216 | 69 |    |
| A4J746_DESRM     | Type IV pilus assembly PilZ                          | Desulfotomaculum reducens (strain MI-1)                                                   | YcgR2-PilZ | 221 | 70 |    |
| A0A151B6Q5_9CLOT | Flagellar protein YcgR                               | Clostridium tepidiprofundum DSM 19306                                                     | YcgR2-PilZ | 217 | 71 |    |
| C6C102_DESAD     | Type IV pilus assembly PilZ                          | Desulfovibrio salexigens (strain ATCC 14822 / DSM 2638 / NCIB 8403 / VKM B-1763)          | YcgR2-PilZ | 229 |    |    |
| A6M180_CLOB8     | Type IV pilus assembly PilZ                          | Clostridium beijerinckii (strain ATCC 51743 / NCIMB 8052)                                 | YcgR2-PilZ | 213 |    |    |
| R1AST9_9CLOT     | Flagellar protein                                    | Caldisalibacter kiritimatiensis                                                           | YcgR2-PilZ | 222 | 72 |    |
| F7NL64_9FIRM     | Type IV pilus assembly PilZ                          | Acetonema longum DSM 6540                                                                 | YcgR2-PilZ | 215 | 73 |    |
| L0FC86_DESDL     | Putative glycosyltransferase                         | Desulfitobacterium dichloroeliminans (strain LMG P-21439 / DCA1)                          | YcgR2-PilZ | 214 | 74 |    |
| R7C6C4_9CLOT     | Type IV pilus assembly PilZ                          | Clostridium sp. CAG:62                                                                    | YcgR2-PilZ | 236 | 75 |    |
| A0A139D977_9FIRM | Flagellar protein                                    | Halanaerobium sp. T82-1                                                                   | YcgR2-PilZ | 213 | 76 |    |
| R7R388_9FIRM     | Flagellar protein                                    | Roseburia sp. CAG:100                                                                     | YcgR2-PilZ | 255 | 77 |    |
| A0A0E3W3A0_9FIRM | PilZ domain                                          | Syntrophomonas zehnderi OL-4                                                              | YcgR2-PilZ | 216 | 78 |    |
| D5CSE9_SIDLE     | Type IV pilus assembly PilZ                          | Sideroxydans lithotrophicus (strain ES-1)                                                 | YcgR2-PilZ | 311 |    |    |
| I8RFB4_9FIRM     | Type IV pilus assembly PilZ                          | Pelosinus fermentans B4                                                                   | YcgR2-PilZ | 215 | 79 |    |
| Q24T82_DESHY     | Putative uncharacterized protein                     | Desulfitobacterium hafniense (strain Y51)                                                 | YcgR2-PilZ | 200 |    |    |
| W1SJT3_9BACI     | Type iv pilus assembly pilz                          | Bacillus vireti LMG 21834                                                                 | YcgR2-PilZ | 207 | 80 | Bv |
| A3WPA0_9GAMM     | Predicted glycosyltransferase                        | Idiomarina baltica OS145                                                                  | YcgR2-PilZ | 233 | 81 |    |
| K8DYS2_9FIRM     | Putative Type IV pilus assembly PilZ                 | Desulfotomaculum hydrothermale Lam5 = DSM 18033                                           | YcgR2-PilZ | 209 | 82 |    |
| W0JLH8_DESAE     | Uncharacterized protein                              | Desulfurella acetivorans A63                                                              | YcgR2-PilZ | 224 | 83 |    |
| A0A0E4HD84_9BACL | Type IV pilus assembly protein PilZ                  | Paenibacillus riograndensis SBR5                                                          | YcgR2-PilZ | 186 | 84 |    |



**Table S3: Amino acid sequences of biosensor plasmids**

Notes: **His-tag**, **Venus ΔC10**, **RLuc8 (4-91)**, **EcYcgR**, **RLuc8 (92-311)**, **mCherry tag**;  
 phylogenetic biosensor variants use the same sequences, except the phylogenetic variant is used  
 in place of EcYcgR.

|                                                      |                                                                                                                                                                                                                                                                                                                                                                                                                                                                                                                                                                                                                                                                                                                                                                                                                                                                                                                                                                                                                                                                                                                                                                                                                                                                                                                |
|------------------------------------------------------|----------------------------------------------------------------------------------------------------------------------------------------------------------------------------------------------------------------------------------------------------------------------------------------------------------------------------------------------------------------------------------------------------------------------------------------------------------------------------------------------------------------------------------------------------------------------------------------------------------------------------------------------------------------------------------------------------------------------------------------------------------------------------------------------------------------------------------------------------------------------------------------------------------------------------------------------------------------------------------------------------------------------------------------------------------------------------------------------------------------------------------------------------------------------------------------------------------------------------------------------------------------------------------------------------------------|
| <p>pRSET-YNL-<br/>EcYcgR-91</p>                      | <p>MRGSHHHHHHGMASMTGGQQMGRDLYDDDDKDPMVSKGEELFTGVVPIILVELDGDVNGHKFSVSGEGEGD<br/>         ATYGKLTCLKLICTTGKLPVPWPTLVTTLGYGLOCFARYPDHMKQHDFFKSAMPEGYVQERTIFFKDDGNY<br/>         KTRAEVKFEGDTLVNRIELKGIDFKEDGNILGHKLEYNYNSHNVYITADKQKNGIKANFKIRHNIEDGGV<br/>         QLADHYQQNTPIGDGPVLLPDNHYLSYQSKLSKDPNEKRDHMLLEFVTAAGGTVYDPEQRKRMITGFPQ<br/>         WVARCKQMNVLDSFINYYDSEKHAENAVIFLHG NATSSYLWRHVVPPIEPVARCIIPDLIGMKGSGKSGN<br/>         GSPWMSHYHEQFLKQNPLAVLGVLRLDLHKAAPLRLSWNGGQLISKLLAITPDKLVLDGFSQAEDNIAVL<br/>         KAQHITITAEQTQAKVEFTVEQLQQSEYLQLPAFITVPPPTLWVQRRRYFRISAPLHPPYFCQTKLADN<br/>         STLRFRLYDLSLGGMGALLE TAKPAELQEGMRF AQIEVNMGQWGVFHFDAQLISISERKVIDGKNETITT<br/>         PRLSFRFLNVSP TVERQLQRIIFSLEREAREKADKVRDELVYRLLDHYKYLTAWFELNLNPKKIFVGHWDW<br/>         GAALAFHYAYEHQDRIKAIVHMESVVDVIESWDEWPDIEEDIALIKSEEGEKMVLENNFFVETVLPKIM<br/>         RKLEPEEFAAYLEPFKEKGEVRRPTLSWPREIPLVKGGKPDVVQIVRNYNAYLRASDDLPKLFI EGD<br/>         PGFFSNAIVEGAKKFPNTEFVKVKGHLHFLQEDAPDEMKGKIKSFVERVLKNEQ*stop</p>                                                                                                                                                                                                                                                                               |
| <p>pET21/24-<br/>YNL-<br/>EcYcgR-91</p>              | <p>MVSKGEELFTGVVPIILVELDGDVNGHKFSVSGEGEGDATYGKLTCLKLICTTGKLPVPWPTLVTTLGYGLO<br/>         CFARYPDHMKQHDFFKSAMPEGYVQERTIFFKDDGNYKTRAEVKFEGDTLVNRIELKGIDFKEDGNILGH<br/>         KLEYNYNSHNVYITADKQKNGIKANFKIRHNIEDGGVQLADHYQQNTPIGDGPVLLPDNHYLSYQSKLSK<br/>         DPNEKRDHMLLEFVTAAGGTVYDPEQRKRMITGFPQWVARCKQMNVLDSFINYYDSEKHAENAVIFLHG<br/>         NATSSYLWRHVVPPIEPVARCIIPDLIGMKGSGKSGN GSPWMSHYHEQFLKQNPLAVLGVLRLDLHKAAPL<br/>         RLRLSWNGGQLISKLLAITPDKLVLDGFSQAEDNIAVLKAQHITITAEQTQAKVEFTVEQLQQSEYLQLPA<br/>         FITVPPPTLWVQRRRYFRISAPLHPPYFCQTKLADNSTLRFRLYDLSLGGMGALLE TAKPAELQEGMRF<br/>         AQIEVNMGQWGVFHFDAQLISISERKVIDGKNETITT PRLSFRFLNVSP TVERQLQRIIFSLEREAREKA<br/>         DKVRDELVYRLLDHYKYLTAWFELNLNPKKIFVGHWDWGAALAFHYAYEHQDRIKAIVHMESVVDVIESW<br/>         EWPDI EEDIALIKSEEGEKMVLENNFFVETVLPKIMRKLEPEEFAAYLEPFKEKGEVRRPTLSWPREIPL<br/>         LVKGGKPDVVQIVRNYNAYLRASDDLPKLFI EGD PGFFSNAIVEGAKKFPNTEFVKVKGHLHFLQEDAPDE<br/>         MGKIKSFVERVLKNEQKLAAALEHHHHHH*stop</p>                                                                                                                                                                                                                                                                                                |
| <p>pET21/24-<br/>YNL-<br/>EcYcgR-91-<br/>mCherry</p> | <p>MVSKGEELFTGVVPIILVELDGDVNGHKFSVSGEGEGDATYGKLTCLKLICTTGKLPVPWPTLVTTLGYGLO<br/>         CFARYPDHMKQHDFFKSAMPEGYVQERTIFFKDDGNYKTRAEVKFEGDTLVNRIELKGIDFKEDGNILGH<br/>         KLEYNYNSHNVYITADKQKNGIKANFKIRHNIEDGGVQLADHYQQNTPIGDGPVLLPDNHYLSYQSKLSK<br/>         DPNEKRDHMLLEFVTAAGGTVYDPEQRKRMITGFPQWVARCKQMNVLDSFINYYDSEKHAENAVIFLHG<br/>         NATSSYLWRHVVPPIEPVARCIIPDLIGMKGSGKSGN GSPWMSHYHEQFLKQNPLAVLGVLRLDLHKAAPL<br/>         RLRLSWNGGQLISKLLAITPDKLVLDGFSQAEDNIAVLKAQHITITAEQTQAKVEFTVEQLQQSEYLQLPA<br/>         FITVPPPTLWVQRRRYFRISAPLHPPYFCQTKLADNSTLRFRLYDLSLGGMGALLE TAKPAELQEGMRF<br/>         AQIEVNMGQWGVFHFDAQLISISERKVIDGKNETITT PRLSFRFLNVSP TVERQLQRIIFSLEREAREKA<br/>         DKVRDELVYRLLDHYKYLTAWFELNLNPKKIFVGHWDWGAALAFHYAYEHQDRIKAIVHMESVVDVIESW<br/>         EWPDI EEDIALIKSEEGEKMVLENNFFVETVLPKIMRKLEPEEFAAYLEPFKEKGEVRRPTLSWPREIPL<br/>         LVKGGKPDVVQIVRNYNAYLRASDDLPKLFI EGD PGFFSNAIVEGAKKFPNTEFVKVKGHLHFLQEDAPDE<br/>         MCKYIKSFVERVLKNEQGGSGGSMVSKGEEDNMAI I KEFMRFKVHMEG SVNGHEFEIEGEGEGRPYEGTQ<br/>         TAKLKVTKGGPLPFAWDILSPQFMYGSKAYVKHPADIPDYLKLSFPEGFKWERVMNFEDGGVTVTQDSS<br/>         LQDGEFIYKVKLRGTNFP SDGPVMQKKTMGWEASSERMYPEDGALKGEIKQRLKLDGGHYDAEVKTTYK<br/>         AKKPVQLPGAYNVNIKLDITSHNEDYITVEQYERAEGRHSTGGMDELYKKLAAALEHHHHHH*stop</p> |

**Table S4: Nucleotide sequences of biosensor plasmids**

Notes: Corresponding nucleotide sequences of amino acid sequences presented in Table S3

|                                         |                                                                                                                                                                                                                                                                                                                                                                                                                                                                                                                                                                                                                                                                                                                                                                                                                                                                                                                                                                                                                                                                                                                                                                                                                                                                                                                                                                                                                                                                                                                                                                                                                                                                                                                                                                                                                                                                                                                                                                                                                                                                                                                                                                                                                                                                                                                                                                                                                                                                                                                                                                                                                                                                                                                               |
|-----------------------------------------|-------------------------------------------------------------------------------------------------------------------------------------------------------------------------------------------------------------------------------------------------------------------------------------------------------------------------------------------------------------------------------------------------------------------------------------------------------------------------------------------------------------------------------------------------------------------------------------------------------------------------------------------------------------------------------------------------------------------------------------------------------------------------------------------------------------------------------------------------------------------------------------------------------------------------------------------------------------------------------------------------------------------------------------------------------------------------------------------------------------------------------------------------------------------------------------------------------------------------------------------------------------------------------------------------------------------------------------------------------------------------------------------------------------------------------------------------------------------------------------------------------------------------------------------------------------------------------------------------------------------------------------------------------------------------------------------------------------------------------------------------------------------------------------------------------------------------------------------------------------------------------------------------------------------------------------------------------------------------------------------------------------------------------------------------------------------------------------------------------------------------------------------------------------------------------------------------------------------------------------------------------------------------------------------------------------------------------------------------------------------------------------------------------------------------------------------------------------------------------------------------------------------------------------------------------------------------------------------------------------------------------------------------------------------------------------------------------------------------------|
| <p>pRSET-YNL-<br/>EcYcgR-91</p>         | <p>ATGCGGGTTCTCATCATCATCATCATCATGGTATGGCTAGCATGACTGGTGGACAGCAAATGGGTGCGGA<br/>TCTGTACGACGATGACGATAAGgattccgATGGTGAACAAGGGCGAGGAGCTGTTACCGGGGTGGTGCCA<br/>TCCTGGTTCGAGCTGGACGGCGACGTAAACGGCCACAAGTTTCAGCGTGTCCGGCGAGGGCGAGGGCGATGCC<br/>ACCTACGGCAAGCTGACCCTGAAGCTGATCTGCACCACCGGCAAGCTGCCCGTGCCTGGCCACCCCTCGT<br/>GACCACCCTGGGCTACGGCCTGCAGTGTTCGCCCGCTACCCCGACCACATGAAGCAGCAGACTTCTTCA<br/>AGTCCGCCATGCCGAAGGCTACGTCCAGGAGCGCACCATCTTCTTCAAGGACGACGGCAACTACAAGACC<br/>CGCGCCGAGGTGAAGTTCGAGGGCGACACCCCTGGTGAACCGCATCGAGCTGAAGGGCATCGACTTCAAGGA<br/>GGACGGCAACATCTGGGGCACAAAGCTGGAGTACAACACTACAACAGCCACAACGCTCTATATCACCGCCGACA<br/>AGCAGAAGAACGGCATCAAGGCCAACTTCAAGATCCGCCACAACATCGAGGACGGCGCGTGCAGCTCGCC<br/>GACCACTACCAGCAGAACACCCCATCGGCGACGGCCCCGTGTCTGCTGCCGACAACCCTACCTGAGCTA<br/>CCAGTCCAAGCTGAGCAAAGACCCCAACGAGAAGCGCGATCACATGGTCTGTGGAGTTCTGTGACCGCCG<br/>CCGGGggtaccAAGGTGTACGACCCCGAGCAGAGGAAGAGGATGATCACCGGCCCCAGTGGTGGGCCAGG<br/>TGCAAGCAGATGAACGTGTGGACAGCTTCACTACTACGACAGCAGAGAAGCAGCCGAGAACGCCGT<br/>GATCTTCTGCACGGCAACGCCaCTAGCAGCTACTGTGGAGGCACGTGGTGGCCACATCGAGCCCGTGG<br/>CCAGGTGCATCATCCCCGATCTGATCGCGATGGCAGAGAGCGGCAAGAGCGGCAAGAGCGGACGCGCAGCccatggATG<br/>agtcattaccatgagcagttcctgaaacaaaatccgtagccgtcctgggctgttacgcgatttgcaaa<br/>agccgcaattcctttgctctcagttggaatggcggcgagctgatcagcaaatctggcaataaccccgg<br/>ataaactgggtgctggatttcggcagtcgaagccgaagacaacatcgccgtgctaaaggcacagcacattacc<br/>attaccgcccgaactcagggtgcaaaagtcagtttactggtgaacaactacagcagagtgaatacttgca<br/>gcttccggcatttattaccgtaccgcctcccacttatggtttgtacaacgacgcccgatatttccgcatct<br/>ccgcccactccatccgcttatttttgcacagcaaaactggcgataacagtagctacgttacgtttccgctg<br/>tatgatttgcgcttagggcgcatgggctgacttactggaaacagcaaaagcctgcccgaattacaagaaggcat<br/>gcgcttcgctcagattgaagtcaacatggggcaatggggtgtttttcactttgacgcccagttaatctcca<br/>tcagcgagcgcaaatgattgatggcaagaatgaaaccatcaccactccccgtctgagcttccgctttctt<br/>aacgtcagcccagcgggtggagcggcaattacagcggattatctctctcagcagagaagccgggaaaa<br/>agcggacaaaagtgcgcgacgagctcTACAGGCTGTCTGGACCACTACAAGTACCTGACCGCCTGGTTCGAGC<br/>TCCTGAACCTGCCAAGAAGATCATCTTCTGTGGCCACGACTGGGGCGCCgcCCTGGCCTTCCACTACgcC<br/>TACGAGCACAGGACAgGATCAAGGCCATCGTGCACatgGAGAGCGTGGTGGACGTGATCGAGAGCTGGGA<br/>CGAGTGGCCAGACATCGAGGAGGACATCGCCCTGATCAAGAGCGAGGAGGGCGAGAAGATGGTGTGGAGA<br/>ACAACCTTCTTCTGGAGACCgTGCTGCCAGCAAGATCATGAGAAAGCTGGAGCCGAGGAGTTCGCCGCC<br/>TACTGGAGCCCTTCAAGGAGAAGGGCGAGGTGAGAAGACCCACCTGAGCTGGCCAGAGAGATCCCCCT<br/>GGTGAAGGGCGGCAAGCCCGACGTGGTGCAGATCGTGAGAACTACAACGCCTACCTGAGAGCCAGCGACG<br/>ACCTGCCAAAGcTGTTCATCGAGggcGACCCCGGCTTCTTTCAGCAACGCCATCGTGGAGGGCGCAAGAAG<br/>TTCCCCAACACCGAGTTCGTGAAGGTGAAGGGCCTGCACTTcctCCAGGAGGACGCCCCGACGAGATGGG<br/>CAAGTACATCAAGAGCTTCTGTGGAGAGAGTGTGAAGAACGAGCAGTAA</p> |
| <p>pET21/24-<br/>YNL-<br/>EcYcgR-91</p> | <p>ATGGTGAGCAAGGGCGAGGAGCTGTTACCGGGGTGGTGGCCATCCTGGTTCGAGCTGGACGGCGACGTAAA<br/>CGGCCACAAGTTCAGCGTGTCCGGCGAGGGCGAGGGCGATGCCACCTACGGCAAGCTGACCCCTGAAGCTGA<br/>TCTGACCACCGGCAAGCTGCCCGTGCCCTGGCCACCCCTCGTACCACCCCTGGGCTACGGCCTGCAGTGC<br/>TTCGCCCGCTACCCCGACCACATGAAGCAGCAGCACTTCTTCAAGTCCGCCATGCCCGAAGGCTACGTCCA<br/>GGAGCGACCATCTTCTTCAAGGACGACGGCAACTACAAGACCCGCGCGAGGTGAAGTTCGAGGGCGACA<br/>CCCTGGTGAACCGCATCGAGCTGAAGGGCATCGACTTCAAGGAGGACGGCAACATCCTGGGGCACAAAGCTG<br/>GAGTACAACACTACAACAGCCACAACGTCTATATCACCGCCGACAAGCAGAAGAACGGCATCAAGGCCAACTT<br/>CAAGATCCGCCACAACATCGAGGACGGCGGGCGTGCAGCTCGCCGACCACTACCAGCAGAACACCCCATCG<br/>GCGACGGCCCCGTGTCTGCTGCCGACAACCACTACCTGAGCTACCAGTCCAAGCTGAGCAAAGACCCCAAC<br/>GAGAAGCGGATCACATGGTCTGCTGGAGTTCGTGACCGCCGCGGGggtaccAAGGTGTACGACCCCGA<br/>GCAGAGGAAGAGGATGATCACCGGCCCCAGTGGTGGCCAGGTGCAAGCAGATGAACGTGTGGACAGCT<br/>TCATCAACTACTACGACAGCAGAGAAGCAGCCGAGAACCGCTGATCTTCTGACGGCAACGCaCTAGC<br/>AGCTACCTGTGGAGCAGCTGGTGCCTCCACATCGAGCCCGTGGCCAGGTGCATCATCCCCGATCTGATCGG<br/>CATGGGCAAGAGCGGCAAGAGCGGCAACGGCAGCccatggATGagtcattaccatgagcagttcctgaaac<br/>aaaatccgtagccgtcctgggctgttacgcgatttgcaaaaagccgcaattcctttgctctcagttgg<br/>aatggcggcgagctgatcagcaaatctggcaataaccccggataaactgggtgctggatttcggcagtc<br/>agccgaagacaacatcgccgtgctaaaggcacagcacattaccattaccgcccgaactcagggtgcaaaag<br/>tcgagtttactgttgaacaactacagcagagtgaataacttgagcttccggcatttattaccgtaccgcct<br/>cccacttatggtttgtacaacgacgcccgatatttccgcatctccgcccactccatccgcttatttttg<br/>ccagacaaaactggcgataacagtagcttacgcttccgctgtatgatttgcgcttagggcgcatgggcg<br/>cattactggaaacagcaaaagcctgcccgaattacaagaaggcatgcgcttcgctcagattgaagtcaacatg<br/>gggcaatggggtgtttttcactttgacgcccagttaatctccatcagcagcgcgaagtgattgatggcaa<br/>gaatgaaaccatcaccactccccgtctgagcttccgcttttctaacgtcagcccagcgggtggagcggcaat</p>                                                                                                                                                                                                                                                                                                                                                                                                                                                                                                                                                                                                                                                                                                                                                                                                                                                                                                                        |

|                                                         |                                                                                                                                                                                                                                                                                                                                                                                                                                                                                                                                                                                                                                                                                                                                                                                                                                                                                                                                                                                                                                                                                                                                                                                                                                                                                                                                                                                                                                                                                                                                                                                                                                                                                                                                                                                                                                                                                                                                                                                                                                                                                                                                                                                                                                                                                                                                                                                                                                                                                                                                                                                                                                                                                                                                                                                                                                                                                                                                                                                                                                                                                                                                                                                                                                                                                                                                                                                                                                                                                                         |
|---------------------------------------------------------|---------------------------------------------------------------------------------------------------------------------------------------------------------------------------------------------------------------------------------------------------------------------------------------------------------------------------------------------------------------------------------------------------------------------------------------------------------------------------------------------------------------------------------------------------------------------------------------------------------------------------------------------------------------------------------------------------------------------------------------------------------------------------------------------------------------------------------------------------------------------------------------------------------------------------------------------------------------------------------------------------------------------------------------------------------------------------------------------------------------------------------------------------------------------------------------------------------------------------------------------------------------------------------------------------------------------------------------------------------------------------------------------------------------------------------------------------------------------------------------------------------------------------------------------------------------------------------------------------------------------------------------------------------------------------------------------------------------------------------------------------------------------------------------------------------------------------------------------------------------------------------------------------------------------------------------------------------------------------------------------------------------------------------------------------------------------------------------------------------------------------------------------------------------------------------------------------------------------------------------------------------------------------------------------------------------------------------------------------------------------------------------------------------------------------------------------------------------------------------------------------------------------------------------------------------------------------------------------------------------------------------------------------------------------------------------------------------------------------------------------------------------------------------------------------------------------------------------------------------------------------------------------------------------------------------------------------------------------------------------------------------------------------------------------------------------------------------------------------------------------------------------------------------------------------------------------------------------------------------------------------------------------------------------------------------------------------------------------------------------------------------------------------------------------------------------------------------------------------------------------------------|
|                                                         | <p>tacagcggattatTTTTctctctcgagcgagaagcccgggaaaaagcggacaaaagtgcgagcagagctcTAC<br/> AGGTGCTGGACCACTACAAGTACCTGACCGCCTGGTTCGAGCTCCTGAACCTGCCAAGAAGATCATCTT<br/> CGTGGGCCACGACTGGGGCGCCgcCCTGGCCTTCCACTACgcCTACGAGCACCAGGACAgGATCAAGGCCA<br/> TCCGTGCACatgGAGAGCGTGGTGGACGTGATCGAGAGCTGGGACGAGTGGCCAGACATCGAGGAGGACATC<br/> GCCCTGATCAAGAGCGAGGAGGGCGAGAAGATGGTGTGTGGAGAACAACCTTCTTCGTGGAGACCgTGCTGCC<br/> CAGCAAGATCATGAGAAAGCTGGAGCCCCGAGGAGTTCGCCGCCTACCTGGAGCCCTTCAAGGAGAAGGGCG<br/> AGGTGAGAAGACCCACCCTGAGCTGGCCAGAGAGATCCCCCTGGTGAAGGGCGGCAAGCCCCGACGTGGTg<br/> CAGATCGTGAGAACTACAACGCCTACCTGAGAGCCAGCGACGACCTGCCAAGcTGTTTCATCGAGggcGA<br/> CCCCGGCTTCTTCAGCAACGCCATCGTGGAGGGCGCCAAGAAGTCCCCAACACCCGAGTTCGTGAAGGTGA<br/> AGGGCCTGCACCTCctCCAGGAGGACGCCCCCGACGAGATGGGCAAGTACATCAAGAGCTTCGTGGAGAGA<br/> GTGCTGAAGAACGAGCAGaagcttgcggccgcactcgagcaccaccaccactga</p>                                                                                                                                                                                                                                                                                                                                                                                                                                                                                                                                                                                                                                                                                                                                                                                                                                                                                                                                                                                                                                                                                                                                                                                                                                                                                                                                                                                                                                                                                                                                                                                                                                                                                                                                                                                                                                                                                                                                                                                                                                                                                                                                                                                                                                                                                                                                                                                                                                                                                                                                                                                                                                      |
| <p>pET21/24-<br/> YNL-<br/> EcYcgR-91-<br/> mCherry</p> | <p>ATGGTGAGCAAGGGCGAGGAGCTGTTACCGGGGTGGTGCCCATCCTGGTTCGAGCTGGACGGCGACGTAAA<br/> CGGCCACAAGTTCAGCGTGTCCGGCGAGGGCGAGGGCGATGCCACCTACGGCAAGCTGACCCCTGAAGCTGA<br/> TCTGCACCACCGCAAGCTGCCCGTGCCCTGGCCACCCTCGTGACCACCCTGGGCTACGGCCTGCAGTGC<br/> TTCGCCCGCTACCCCGACCACATGAAGCAGCAGACTTCTTCAAGTCCGCCATGCCGAAGGCTACGTCCA<br/> GGAGCGCACCATCTTCTTCAAGGACGACGGCAACTACAAGACCCGCGCGAGGTGAAGTTCGAGGGCGACA<br/> CCCTGGTGAACCGCATCGAGCTGAAGGGCATCGACTTCAAGGAGGACGGCAACATCCTGGGGACAAGCTG<br/> GAGTACAACACTACAACAGCCACAACGTCTATATCACCGCCGACAAGCAGAAGAACCGGCATCAAGGCCAAT<br/> CAAGATCCGCCCAACATCGAGGACGGCGCGCTGCAGCTCGCCGACCACCTACCAGACAACCCCTACCTCG<br/> GCGACGGCCCCGTGCTGCTGCCGACAACACTACCTGAGCTACCAGTCCAAGCTGAGCAAAGACCCCAAC<br/> GAGAAGCGGATCACATGGTCTGCTGGAGTTCGTGACCGCCCGGGggtaccAAGGTGTACGACCCCGA<br/> GCAGAGGAAGAGGATGATCACCGGCCCCAGTGGTGGGCCAGGTGCAAGCAGATGAACGTGCTGGACAGCT<br/> TCATCAACTACTACGACAGCGAGAAGCACGCCGAGAACGCCGTGATCTTCTGCACGGCAACGCCaCTAGC<br/> AGCTACCTGTGGAGGCAGTGGTGGCCACATCGAGCCCGTGGCCAGGTGCATCATCCCCGATCTGATCGG<br/> CATGGGCAAGAGCGGCAAGAGCGGCAACGGCAGCCatggATGagtcattaccatgagcagttcctgaaac<br/> aaaatccggttagccgtcctggcggtgttacgcgatttgcaaaaagccgcaattcctttgcgctcagttgg<br/> aatggcgggagctgatcagcaaatctactggcaataaaccggataaactggtgctggatttcggcagtc<br/> agccgaagacaacatcgccgtgctaaaggcacagcacattaccattaccgcccgaactcagggtgcaaaag<br/> tcgagtttactgttgaacaactacagcagagtgataacttgagcttccggcatttattaccgtaccgct<br/> cccacttatggtttgtacaacgacgcccgatatttccgcatctccgcccactccatccgccttatttttg<br/> ccagacaaaactggcggataaacgtaagttacggttccgctgtatgatttgcgtagggggcatgggag<br/> cattactggaacagcaaaagcctgccaattacaagaagccatgagcttccgctcagattgaagtcaacatg<br/> ggcaatggggtgtttttcactttgacgcccagttaatctccatcagcagcgcgcaagtgattgatggcaa<br/> gaatgaaaccatcaccactccccgtctgagcttccggttttcttaacgtcagcccagcggaggcggcaat<br/> tacagcggattatTTTTctctctcgagcgagaagcccgggaaaaagcggacaaaagtgcgagcagagctcTAC<br/> AGGTGCTGGACCACTACAAGTACCTGACCGCCTGGTTCGAGCTCCTGAACCTGCCAAGAAGATCATCTT<br/> CGTGGGCCACGACTGGGGCGCCgcCCTGGCCTTCCACTACgcCTACGAGCACCAGGACAgGATCAAGGCCA<br/> TCCGTGCACatgGAGAGCGTGGTGGACGTGATCGAGAGCTGGGACGAGTGGCCAGACATCGAGGAGGACATC<br/> GCCCTGATCAAGAGCGAGGAGGGCGAGAAGATGGTGTGTGGAGAACAACCTTCTTCGTGGAGACCgTGCTGCC<br/> CAGCAAGATCATGAGAAAGCTGGAGCCCCGAGGAGTTCGCCGCCTACCTGGAGCCCTTCAAGGAGAAGGGCG<br/> AGGTGAGAAGACCCACCCTGAGCTGGCCAGAGAGATCCCCCTGGTGAAGGGCGGCAAGCCCCGACGTGGTg<br/> CAGATCGTGAGAACTACAACGCCTACCTGAGAGCCAGCGACGACCTGCCAAGcTGTTTCATCGAGggcGA<br/> CCCCGGCTTCTTCAGCAACGCCATCGTGGAGGGCGCCAAGAAGTCCCCAACACCCGAGTTCGTGAAGGTGA<br/> AGGGCCTGCACCTCctCCAGGAGGACGCCCCCGACGAGATGGGCAAGTACATCAAGAGCTTCGTGGAGAGA<br/> GTGCTGAAGAACGAGCAGggatccggcggcagcggcggcagcATGGTGAAGCAAGGGCGAGGAGGATAAATC<br/> GGCCATCATCAAGGAGTTCATGCGCTTCAAGGTGCACATGGAGGGCTCCGTGAACGGCCACGATTCGAGA<br/> TCGAGGGCGAGGGCGAGGGCGCCCTACGAGGGCACCCAGACCGCCAAGCTGAAGGTGACCAAGGGTGGC<br/> CCCCTGCCCTTCGCTGGGACATCCTGTCCCTCAGTTCATGTACGGCTCCAAGGCTACGTGAAGCACCC<br/> CGCCGACATCCCCGACTACTTGAAGCTGTCTTCCCCGAGGGCTCAAGTGGGAGCGCGTGAACCTTCG<br/> AGGACGGCGGGCGTGGTGACCGTGACCCAGGACTCCTCCCTGCAGGACGGCGAGTTCATCTACAAGGTGAAG<br/> CTGCGCGGCACCAACTTCCCCCGACGGCCCCGTAATGCAGAAGAAGACCATGGGCTGGGAGGCTCCTC<br/> CGAGCGGATGTACCCCGAGGACGGCGCCCTGAAGGGCGAGATCAAGCAGAGGCTGAAGCTGAAGGACGGCG<br/> GCCACTACGACGCTGAGGTCAAGACCACCTACAAGGCCAAGAAGCCCGTGCAGCTGCCGGCGCCTACAAC<br/> GTCAACATCAAGTTGGACATCACCTCCACAACGAGGACTACCCATCGTGGAAACAGTACGAACCGCCGA<br/> GGCCGCCACTCCACGGCGGCATGGACGAGCTGTACAAGaagcttgcggccgcactcgagcaccaccacc<br/> accaccactga</p> |

## **SUPPLEMENTAL NOTES**

**EcYcgR mutations.** The R113L mutation (M1) in YNL-EcYcgR was predicted to change the c-di-GMP binding stoichiometry from 2:1 to 1:1 as well as reduce affinity for c-di-GMP based on analysis of the corresponding mutant in the YcgR protein PP4397 from *P. putida*.<sup>5</sup> As expected, M1 showed reduced affinity in the lysate-based assay (Figure S2b). Measurements with purified protein confirmed the reduced affinity and showed that binding stoichiometry was very slightly reduced compared to WT (Figure S2c). The oligomeric states of c-di-GMP are dependent on the ions present, with potassium (present at 100 mM in the binding assay buffer) promoting the formation of higher order oligomeric complexes, which may have complicated measurements of the binding stoichiometry.<sup>5,6</sup>

The R118D mutation (M2) in YNL-EcYcgR was predicted to knock out binding for c-di-GMP, as this residue should make key interactions with the phosphate linkage of c-di-GMP. This mutation effectively ablated binding to c-di-GMP, as expected.

The S147A mutation (M3) in the YNL-EcYcgR scaffold was predicted to modestly improve affinity for c-di-GMP based on literature measurements (Ryjenkov *et al.* reported a  $K_D$  change from  $0.84 \pm 0.16 \mu\text{M}$  to  $0.69 \mu\text{M}$  for full-length EcYcgR<sup>7</sup>), but our lysate-based measurements showed slightly reduced affinity instead. This discrepancy may be due to differences in the protein constructs, the assay methods (Ryjenkov *et al.* used equilibrium dialysis with purified protein), and buffer conditions. Interestingly, the corresponding mutant in PP4397 has a 4-fold reduced affinity as measured by ITC, which is in line with our result.<sup>5</sup>

Due to additive effects, the S147A/R113L double mutation (M4) showed poorer affinity than either M1 or M3 mutation alone.

M1, M3, and M4 mutations to YNL-EcYcgR unexpectedly led to decreased signal changes (Figure S2c). These mutations to the c-di-GMP binding pocket may subtly alter the conformation of the bound or unbound state of the sensor domain.

**Linker screen.** The different linker regions tested in YNL-EcYcgR all showed decreased signal changes compared to the original linker sequence used (Figure S2d). While no crystal structure is available for EcYcgR that would allow for a rational design of the linker regions, crystal structures of the homologous YcgR protein PP4397 from *P. putida* provide some degree of insight into the relative distance and orientation of the N- and C-termini in YcgR proteins. PP4397 was analyzed in the phylogenetic screen (sequence 2 in Figure S4a) and was found to behave very

similarly to EcYcgR, which suggests that their overall structures are likely similar. In the apo x-ray crystal structure of full length PP4397 (PDB ID: 2GJG), the distance between C $\alpha$  atoms of the N- and C-termini is  $\sim 25.7$  Å. This distance appears to be too long to be bridged by the original linker that gave a functional YNL-EcYcgR biosensor, which was 2 residues. However, we note that the first  $\sim 11$  N-terminal residues and the last  $\sim 3$  C-terminal residues are largely unstructured, so may serve as flexible linkers on their own.

Prior to this structural analysis, we had designed new linkers to be either flexible or rigid with varying lengths from 2 to 5 residues. All of the linkers tested showed similarly decreased signal changes compared to the original linker, which suggests that they led to increased interaction of RLuc halves in the unbound state. These results indicate that shortening the linkers or truncating the YcgR protein may lead to improved signal change and/or brightness for YNL-EcYcgR, but these changes are unlikely to be directly translatable to other phylogenetic variants, which are of different lengths. Since the original linkers were applied successfully to YNL-EcYcgR and other Nano-lantern-based biosensors,<sup>8</sup> they were carried forward to the phylogenetic screen.

### **Supplemental References**

- (1) Gibson, D. G., Young, L., Chuang, R. Y., Venter, J. C., Hutchison, C. A., and Smith, H. O. (2009) Enzymatic assembly of DNA molecules up to several hundred kilobases. *Nat. Methods* 6, 343–345.
- (2) Oberortner, E., Cheng, J. F., Hillson, N. J., and Deutsch, S. (2017) Streamlining the Design-to-Build Transition with Build-Optimization Software Tools. *ACS Synth. Biol.* 6, 485–496.
- (3) McKenna, A., Hanna, M., Banks, E., Sivachenko, A., Cibulskis, K., Kernytsky, A., Garimella, K., Altshuler, D., Gabriel, S., Daly, M., and DePristo, M. A. (2010) The Genome Analysis Toolkit: A MapReduce framework for analyzing next-generation DNA sequencing data. *Genome Res.* 20, 1297–1303.
- (4) Studier, F. W. (2005) Protein production by auto-induction in high-density shaking cultures. *Protein Expr. Purif.* 41, 207–234.
- (5) Ko, J., Ryu, K. S., Kim, H., Shin, J. S., Lee, J. O., Cheong, C., and Choi, B. S. (2010) Structure of PP4397 reveals the molecular basis for different c-di-GMP binding modes by pilz domain proteins. *J. Mol. Biol.* 398, 97–110.
- (6) Zhang, Z., Kim, S., Gaffney, B. L., and Jones, R. A. (2006) Polymorphism of the signaling molecule c-di-GMP. *J. Am. Chem. Soc.* 128, 7015–7024.
- (7) Ryjenkov, D. A., Simm, R., Römling, U., and Gomelsky, M. (2006) The PilZ domain is a receptor for the second messenger c-di-GMP: The PilZ domain protein YcgR controls motility in enterobacteria. *J. Biol. Chem.* 281, 30310–30314.
- (8) Saito, K., Chang, Y.-F., Horikawa, K., Hatsugai, N., Higuchi, Y., Hashida, M., Yoshida, Y., Matsuda, T., Arai, Y., and Nagai, T. (2012) Luminescent proteins for high-speed single-cell and whole-body imaging. *Nat. Commun.* 3, 1262.
